# Supplementary material
Source: HighWire-hosted journal article supplement (http://www.qdcxjkg.com/highwire/filestream/126495/field_highwire_adjunct_files/10/ERJ-00937-2015_Table_S2.pdf)
Supplement: ERJ-00937-2015_Table_S2.pdf [file ERJ-00937-2015_Table_S2.pdf]

Supplementary Table S2: Correlation of histomorphological characteristics with clinicopathological parameters

|            | Overall     | Histological subtype |              |           |         | Budding (per HPF) |             |           |         | Budding (per 10 HPF) |             |            |         | Smallest tumor cell nest (overall) |             |             |             | Smallest tumor cell nest (invasive margin) |              |            |             | Nuclear size |         |             |             | Stromal content |         |             |             | Grade       |         |             |             |            |         |  |
|------------|-------------|----------------------|--------------|-----------|---------|-------------------|-------------|-----------|---------|----------------------|-------------|------------|---------|------------------------------------|-------------|-------------|-------------|--------------------------------------------|--------------|------------|-------------|--------------|---------|-------------|-------------|-----------------|---------|-------------|-------------|-------------|---------|-------------|-------------|------------|---------|--|
|            |             | non-keratinizing     | keratinizing | basaloid  | p-value | none              | <5 foci     | ≥5 foci   | p-value | none                 | <15 foci    | ≥15 foci   | p-value | single cells                       | 1-4 cells   | 5-14 cells  | ≥15 cells   | p-value                                    | single cells | 1-5 cells  | 5-14 cells  | ≥15 cells    | p-value | small       | medium      | large           | p-value | low         | moderate    | high        | p-value | G1          | G2          | G3         | p-value |  |
| Age        | 541 (100%)  | 344 (63.7%)          | 178 (33.0%)  | 18 (3.3%) |         | 356 (65.8%)       | 163 (30.1%) | 22 (4.1%) |         | 356 (65.8%)          | 101 (18.7%) | 84 (15.5%) |         | 92 (17.1%)                         | 166 (30.9%) | 114 (21.1%) | 166 (30.9%) |                                            | 97 (18%)     | 92 (17.1%) | 141 (26.2%) | 208 (38.7%)  |         | 310 (57.3%) | 104 (19.2%) | 127 (23.5%)     |         | 152 (31.6%) | 156 (32.4%) | 173 (36.0%) |         | 247 (46.7%) | 239 (45.2%) | 43 (8.1%)  |         |  |
| below mean | 255 (47.1%) | 144 (56.5%)          | 102 (40.0%)  | 9 (3.5%)  | 0.004   | 170 (66.7%)       | 77 (30.2%)  | 8 (3.1%)  | 0.665   | 170 (66.7%)          | 43 (16.9%)  | 42 (16.5%) | 0.730   | 47 (18.6%)                         | 76 (30.2%)  | 51 (20.2%)  | 78 (31%)    | 0.645                                      | 46 (18.2%)   | 41 (16.2%) | 67 (26.5%)  | 99 (39.1%)   | 0.837   | 133 (52.2%) | 57 (22.4%)  | 65 (25.5%)      | 0.059   | 72 (31.3%)  | 69 (30.0%)  | 89 (38.7%)  | 0.440   | 116 (46.8%) | 107 (43.1%) | 25 (10.1%) | 0.523   |  |
| above mean | 286 (52.9%) | 200 (70.2%)          | 76 (26.7%)   | 9 (3.2%)  |         | 186 (65.0%)       | 86 (30.1%)  | 14 (4.9%) |         | 186 (65.0%)          | 58 (20.3%)  | 42 (14.7%) |         | 45 (15.7%)                         | 90 (31.5%)  | 63 (22%)    | 88 (30.8%)  |                                            | 51 (17.9%)   | 51 (17.9%) | 74 (26%)    | 109 (38.2%)  |         | 177 (61.9%) | 47 (16.4%)  | 62 (21.7%)      |         | 80 (31.9%)  | 87 (34.7%)  | 84 (33.5%)  |         | 131 (46.6%) | 132 (47%)   | 18 (6.4%)  |         |  |
| Sex        |             |                      |              |           |         |                   |             |           |         |                      |             |            |         |                                    |             |             |             |                                            |              |            |             |              |         |             |             |                 |         |             |             |             |         |             |             |            |         |  |
| male       | 442 (81.7%) | 276 (62.4%)          | 150 (33.9%)  | 16 (3.6%) | 0.385   | 297 (67.2%)       | 126 (28.5%) | 19 (4.3%) | 0.161   | 297 (67.2%)          | 78 (17.6%)  | 67 (15.2%) | 0.158   | 69 (15.7%)                         | 141 (32%)   | 90 (20.5%)  | 140 (31.8%) | 0.239                                      | 75 (17.1%)   | 75 (17.1%) | 116 (26.4%) | 173 (39.4%)  | 0.248   | 258 (58.4%) | 88 (19.9%)  | 96 (21.7%)      | 0.096   | 130 (33.3%) | 128 (32.8%) | 132 (33.8%) | 0.033   | 202 (46.8%) | 199 (46.2%) | 30 (7.0%)  | 0.306   |  |
| female     | 99 (18.3%)  | 68 (69.4%)           | 28 (28.6%)   | 2 (2.0%)  |         | 59 (59.6%)        | 37 (37.4%)  | 3 (3.0%)  |         | 59 (59.6%)           | 23 (23.2%)  | 17 (17.2%) |         | 23 (23.5%)                         | 25 (25.5%)  | 24 (24.5%)  | 26 (26.5%)  |                                            | 22 (22.2%)   | 17 (17.2%) | 25 (25.3%)  | 35 (35.3%)   |         | 52 (52.5%)  | 16 (16.2%)  | 31 (31.3%)      |         | 22 (24.2%)  | 28 (30.8%)  | 41 (45.1%)  |         | 45 (45.9%)  | 40 (40.8%)  | 13 (13.3%) |         |  |
| pT         |             |                      |              |           |         |                   |             |           |         |                      |             |            |         |                                    |             |             |             |                                            |              |            |             |              |         |             |             |                 |         |             |             |             |         |             |             |            |         |  |
| 1          | 94 (17.4%)  | 55 (59.1%)           | 36 (38.7%)   | 2 (2.2%)  | 0.389   | 72 (76.6%)        | 20 (21.3%)  | 2 (2.1%)  | 0.002   | 72 (76.6%)           | 14 (14.9%)  | 8 (8.5%)   | 0.002   | 9 (9.6%)                           | 29 (30.9%)  | 18 (19.1%)  | 38 (40.4%)  | 0.037                                      | 13 (13.8%)   | 10 (10.6%) | 24 (25.6%)  | 47 (50%)     | 0.005   | 62 (66.0%)  | 16 (17.0%)  | 16 (17.0%)      | 0.201   | 34 (40.5%)  | 22 (26.2%)  | 28 (33.3%)  | 0.212   | 51 (55.4%)  | 38 (41.3%)  | 3 (3.3%)   | 0.026   |  |
| 2          | 336 (62.1%) | 214 (63.7%)          | 110 (32.7%)  | 12 (3.6%) |         | 222 (66.1%)       | 100 (29.8%) | 14 (4.2%) |         | 222 (66.1%)          | 59 (17.6%)  | 55 (16.4%) |         | 63 (18.9%)                         | 101 (30.3%) | 72 (21.7%)  | 97 (29.1%)  |                                            | 61 (18.3%)   | 53 (15.9%) | 94 (28.2%)  | 125 (37.5%)  |         | 187 (55.7%) | 65 (19.3%)  | 84 (25.0%)      |         | 93 (31.2%)  | 93 (31.2%)  | 112 (37.6%) |         | 153 (46.2%) | 146 (44.1%) | 32 (9.7%)  |         |  |
| 3          | 92 (17.0%)  | 62 (67.4%)           | 27 (29.3%)   | 3 (3.3%)  |         | 52 (56.5%)        | 34 (37.0%)  | 6 (6.5%)  |         | 52 (56.5%)           | 23 (25.0%)  | 17 (18.5%) |         | 16 (17.4%)                         | 28 (30.4%)  | 20 (21.8%)  | 28 (30.4%)  |                                            | 21 (22.8%)   | 22 (23.9%) | 18 (19.6%)  | 31 (33.7%)   |         | 50 (54.3%)  | 19 (20.7%)  | 23 (25.0%)      |         | 21 (25.6%)  | 35 (42.7%)  | 26 (31.7%)  |         | 38 (43.2%)  | 44 (50%)    | 6 (6.8%)   |         |  |
| 4          | 19 (3.5%)   | 13 (68.4%)           | 5 (26.3%)    | 1 (5.3%)  |         | 10 (52.6%)        | 9 (47.4%)   | 0 (0.0%)  |         | 10 (52.6%)           | 5 (26.3%)   | 4 (21.1%)  |         | 4 (21.1%)                          | 8 (42.1%)   | 4 (21.1%)   | 3 (15.7%)   |                                            | 2 (10.5%)    | 7 (36.8%)  | 5 (26.3%)   | 5 (26.3%)    |         | 11 (57.9%)  | 4 (21.1%)   | 4 (21.1%)       |         | 4 (23.5%)   | 6 (35.3%)   | 7 (41.2%)   |         | 5 (27.8%)   | 11 (61.1%)  | 2 (11.1%)  |         |  |
| pN         |             |                      |              |           |         |                   |             |           |         |                      |             |            |         |                                    |             |             |             |                                            |              |            |             |              |         |             |             |                 |         |             |             |             |         |             |             |            |         |  |
| 0          | 260 (48.6%) | 169 (65.3%)          | 80 (30.9%)   | 10 (3.9%) | 0.804   | 183 (70.4%)       | 67 (25.8%)  | 10 (3.8%) | 0.315   | 183 (70.4%)          | 46 (17.7%)  | 31 (11.9%) | 0.297   | 41 (15.8%)                         | 66 (25.5%)  | 58 (22.4%)  | 94 (36.3%)  | 0.042                                      | 42 (16.2%)   | 35 (13.5%) | 67 (25.9%)  | 115 (44.4%)  | 0.171   | 149 (57.3%) | 49 (18.8%)  | 62 (23.8%)      | 0.636   | 88 (37.8%)  | 68 (29.2%)  | 77 (33.0%)  | 0.043   | 136 (53.3%) | 103 (40.4%) | 16 (6.3%)  | 0.056   |  |
| 1          | 172 (32.1%) | 102 (59.3%)          | 64 (37.2%)   | 6 (3.5%)  |         | 101 (58.7%)       | 62 (36.0%)  | 5 (2.8%)  |         | 101 (58.7%)          | 32 (18.6%)  | 39 (22.7%) |         | 33 (19.2%)                         | 59 (34.3%)  | 37 (21.5%)  | 43 (25%)    |                                            | 39 (22.7%)   | 33 (19.2%) | 47 (27.3%)  | 53 (30.8%)   |         | 98 (57.0%)  | 29 (16.9%)  | 45 (26.2%)      |         | 40 (25.6%)  | 58 (37.2%)  | 58 (37.2%)  |         | 68 (40.3%)  | 81 (47.9%)  | 20 (11.8%) |         |  |
| 2          | 102 (19.1%) | 68 (66.7%)           | 32 (31.4%)   | 2 (2.0%)  |         | 69 (67.6%)        | 31 (30.4%)  | 2 (2.0%)  |         | 69 (67.6%)           | 21 (20.6%)  | 12 (11.8%) |         | 15 (15%)                           | 39 (39%)    | 18 (18%)    | 28 (28%)    |                                            | 13 (13%)     | 23 (23%)   | 25 (25%)    | 39 (39%)     |         | 61 (59.8%)  | 23 (22.5%)  | 18 (17.6%)      |         | 23 (26.7%)  | 27 (31.4%)  | 36 (41.9%)  |         | 41 (41.8%)  | 52 (53.1%)  | 5 (5.1%)   |         |  |
| 3          | 1 (0.2%)    | 1 (100%)             | 0 (0%)       | 0 (0%)    |         | 1 (100%)          | 0 (0%)      | 0 (0%)    |         | 1 (100%)             | 0 (0%)      | 0 (0%)     |         | 0 (0%)                             | 0 (0%)      | 1 (100%)    | 0 (0%)      |                                            | 0 (0%)       | 0 (0%)     | 1 (100%)    | 0 (0%)       |         | 0 (0%)      | 0 (0%)      | 1 (100.0%)      |         | 1 (100%)    | 0 (0%)      | 0 (0%)      |         | 1 (100%)    | 0 (0%)      | 0 (0%)     |         |  |
| pM         |             |                      |              |           |         |                   |             |           |         |                      |             |            |         |                                    |             |             |             |                                            |              |            |             |              |         |             |             |                 |         |             |             |             |         |             |             |            |         |  |
| 0          | 536 (99.1%) | 342 (63.9%)          | 176 (32.9%)  | 17 (3.2%) | 0.094   | 353 (65.9%)       | 161 (30.0%) | 22 (4.1%) | 0.799   | 353 (65.9%)          | 100 (18.7%) | 83 (15.5%) | 0.778   | 91 (17.1%)                         | 164 (30.7%) | 114 (21.4%) | 164 (30.8%) | 0.905                                      | 96 (18%)     | 91 (17.1%) | 140 (26.3%) | 206 (38.6%)  | 0.912   | 306 (57.1%) | 104 (19.4%) | 126 (23.5%)     | 0.481   | 151 (31.7%) | 154 (32.4%) | 171 (35.9%) | 0.669   | 245 (46.8%) | 236 (45%)   | 43 (8.2%)  | 0.959   |  |
| 1          | 5 (0.9%)    | 2 (40.0%)            | 2 (40.0%)    | 1 (20.0%) |         | 3 (60.0%)         | 2 (40.0%)   | 0 (0.0%)  |         | 3 (60.0%)            | 1 (20.0%)   | 1 (20.0%)  |         | 1 (20%)                            | 2 (40%)     | 0 (0%)      | 2 (40%)     |                                            | 1 (20%)      | 1 (20%)    | 1 (20%)     | 2 (40%)      |         | 4 (80.0%)   | 0 (0.0%)    | 1 (20.0%)       |         | 1 (20.0%)   | 2 (40.0%)   | 2 (40.0%)   |         | 2 (40%)     | 3 (60%)     | 0 (0%)     |         |  |
| Stage      |             |                      |              |           |         |                   |             |           |         |                      |             |            |         |                                    |             |             |             |                                            |              |            |             |              |         |             |             |                 |         |             |             |             |         |             |             |            |         |  |
| 1          | 191 (35.3%) | 130 (68.4%)          | 54 (28.4%)   | 6 (3.2%)  | 0.842   | 131 (68.6%)       | 52 (27.2%)  | 8 (4.2%)  | 0.481   | 131 (68.6%)          | 34 (17.8%)  | 26 (13.6%) | 0.470   | 30 (15.8%)                         | 53 (27.9%)  | 42 (22.1%)  | 65 (34.2%)  | 0.222                                      | 34 (17.8%)   | 25 (13.1%) | 53 (27.7%)  | 79 (41.4%)   | 0.271   | 104 (54.5%) | 36 (18.8%)  | 51 (26.7%)      | 0.391   | 68 (39.3%)  | 46 (26.6%)  | 59 (34.1%)  | 0.082   | 97 (51.3%)  | 78 (41.3%)  | 14 (7.4%)  | 0.310   |  |
| 2          | 198 (36.6%) | 109 (55.1%)          | 81 (40.9%)   | 8 (4.0%)  |         | 126 (63.6%)       | 62 (31.4%)  | 10 (5.1%) |         | 126 (63.6%)          | 35 (17.7%)  | 37 (18.7%) |         | 39 (19.7%)                         | 58 (29.3%)  | 42 (21.2%)  | 59 (29.8%)  |                                            | 38 (19.3%)   | 35 (17.8%) | 46 (23.4%)  | 78 (39.5%)   |         | 120 (60.6%) | 36 (18.2%)  | 42 (21.2%)      |         | 50 (28.6%)  | 59 (33.7%)  | 66 (37.7%)  |         | 88 (45.1%)  | 86 (44.1%)  | 21 (10.8%) |         |  |
| 3          | 147 (27.2%) | 103 (70.1%)          | 41 (27.9%)   | 3 (2.0%)  |         | 96 (65.3%)        | 47 (32.0%)  | 4 (2.7%)  |         | 96 (65.3%)           | 31 (21.1%)  | 20 (13.6%) |         | 22 (15.2%)                         | 53 (36.6%)  | 30 (20.7%)  | 40 (27.5%)  |                                            | 24 (16.6%)   | 31 (21.4%) | 41 (28.2%)  | 49 (33.8%)   |         | 82 (55.8%)  | 32 (21.8%)  | 33 (22.4%)      |         | 33 (25.8%)  | 49 (38.3%)  | 46 (35.9%)  |         | 60 (42.9%)  | 72 (51.4%)  | 8 (5.7%)   |         |  |
| 4          | 5 (0.9%)    | 2 (40%)              | 2 (40%)      | 1 (20%)   |         | 3 (60%)           | 2 (40%)     | 0 (0%)    |         | 3 (60%)              | 1 (20%)     | 1 (20%)    |         | 1 (20%)                            | 2 (40%)     | 0 (0%)      | 2 (40%)     |                                            | 1 (20%)      | 1 (20%)    | 1 (20%)     | 2 (40%)      |         | 4 (80%)     | 0 (0%)      | 1 (20%)         |         | 1 (20%)     | 2 (40%)     | 2 (40%)     |         | 2 (40%)     | 3 (60%)     | 0 (0%)     |         |  |
| Ki-67      |             |                      |              |           |         |                   |             |           |         |                      |             |            |         |                                    |             |             |             |                                            |              |            |             |              |         |             |             |                 |         |             |             |             |         |             |             |            |         |  |
| mean       | 47.89       | 46.99                | 48.28        | 63.09     | 0.021   | 48.16             | 47.69       | 45.11     | 0.833   | 48.16                | 49.59       | 44.71      | 0.359   | 47.69                              | 47.01       | 46.99       | 49.50       | 0.764                                      | 46.86        | 46.78      | 46.20       | 50.09        | 0.413   | 48.05       | 49.20       | 46.41           | 0.663   | 52.26       | 45.18       | 45.67       | 0.014   | 48.87       | 47.78       | 46.13      | 0.746   |  |
| SD         | 23.39       | 23.73                | 22.81        | 17.05     |         | 23.98             | 23.13       | 14.91     |         | 23.98                | 23.55       | 20.44      |         | 23.79                              | 21.78       | 23.29       | 24.81       |                                            | 22.51        | 22.08      | 23.39       | 24.40        |         | 23.13       | 24.60       | 23.10           |         | 24.40       | 23.66       | 22.08       |         | 24.86       | 22.17       | 21.39      |         |  |
